# Supplementary material for: Accelerating water exchange for GdIIIchelates by steric compression around the water binding site
Source: Royal Society of Chemistry journal article supplement (doi:10.1039/b207713b), 2002-01-01

# Electronic Supplementary Information (ESI) for Chemical Communications

**Accelerating water exchange for GdIII chelates by steric compression around the water binding site**

Robert Ruloff,a Éva Tóth,a Rosario Scopelliti,a Raphaël Tripier,b Henri Handelb and André E. Merbacha*

*

aEcole Polytechnique Fédérale de Lausanne, ICMB, BCH, Lausanne, Switzerland. Fax: 41 21 693 9875; Tel:41 21 693 9871, E-mail: [andre.merbach@epfl.ch](mailto:andre.merbach@epfl.ch)

b Université de Bretagne Occidentale, 6 av. Le Gorgeu, BP 809, 29285 Brest, France. Fax: 33 298 01 65 94; Tel: 33 298 01 79 27, E-mail: [Henri.Handel@univ-brest.fr](mailto:Henri.Handel@univ-brest.fr)

**Synthesis** of TRITA and TRITA-bz-NO2

**Table S1** Variable temperature reduced transverse and longitudinal 17O relaxation rates and chemical shifts of [GdIII(TRITA)(H2O)]- solution at 9.4 T

**Table S2** Variable temperature reduced transverse and longitudinal 17O relaxation rates and chemical shifts of [GdIII(TRITA-bz-NO2)(H2O)]- solution at 9.4 T

**Fig. S1** Temperature dependence of the reduced transverse, longitudinal 17O relaxation rates and chemical shifts for [Gd(TRITA-bz-NO2)(H2O)]- at B=9.4 T.

### Fig. S2 Temperature dependence of the reduced transverse, longitudinal 17O relaxation rates and chemical shifts for [Gd(TRITA)(H2O)]- at B=9.4 T.

### Synthesis of 1,4,7,10-tetraazacyclotridecane tetraacetic acid (TRITA)

*1,4,7,10-Tetraazacyclotridecane (Synthesis by bis-aminal methodology).* The protection of 1,4,8,11-tetraazaundecane with butanedione and the following cyclisation with 1,2-dibromoethane was performed as previously described [1]. Deprotection of the resulting intermediate was carried out with neat hydrazine monohydrate as proposed in the literature [2], but the product was already recovered after recrystallization in acetone and not converted into the tetrahydrochloride from.

*1,4,7,10-Tetraazacyclotridecane tetraacetic acid tetraethyl ester.* 1,4,7,10-Tetraazacyclotri-decane (1.0 g, 5.37 mmol) and K2CO3 (5.9 g, 42.9 mmol) were refluxed in freshly distilled acetonitrile (45 ml) under nitrogen atmosphere. Ethyl bromoacetate (4.2 eq, 3.76 g, 22.5 mmol) in freshly distilled acetonitrile (45 ml) was slowly added dropwise and the mixture was refluxed for 16 h. The reaction solution was filtered and the solvent was evaporated under reduced pressure. The residue was dissolved in CH2Cl2 (40 ml), and the resulting solution was consecutively washed with 2M HCl (240 ml) and 2M NaOH (240 ml). The organic phase was separated, and then concentrated and dried under reduced pressure. 1,4,7,10-Tetraazacyclotridecane tetraacetic acid tetraethyl ester was obtained as a yellow oil (2.65 g, 93%). 1H NMR ** 1.13 (t, 6H), 1.14 (t, 6H), 1.41 (q, 2H), 2.58 (t, 4H), 2.59 (t, 4H), 2.66 (t, 4H), 2.68 (s, 4H), 3.17 (s, 4H), 3.31 (s, 4H), 4.01 (qd, 4H), 4.02 (qd, 4H); 13C NMR ** 14.7, 14.8, 25.2, 51.1, 51.6, 52.4, 52.8, 55.4, 56.3, 60.5, 60.6, 172.1, 172.2; Analysis calc. for C25H46N4O8: C 56.58, H 8.74, N 10.56; found: C 56.07, H 8.75, N 10.45.

*1,4,7,10-Tetraazacyclotridecane tetraacetic acid.* 1,4,7,10-Tetraazacyclotridecane tetraacetic acid tetraethyl ester (300 mg, 0.565 mmol) was refluxed in 6M HCl (20 ml) during 16 h, evaporated to dryness, dissolved in a minimum of water and loaded on a cation-exchange column (Bio-Rad AG 50W-X4, H+ form, 1.57 cm). The column was washed with water until the eluate had a pH of ca. 7 and the product was eluted in one fraction with 0.5 M NH3 (50 ml). This fraction was evaporated to dryness, dissolved in a minimum of water and loaded on an anion-exchange column (Bio-Rad AG 1-X4, converted into HCOO form, 27 cm). The column was washed with water until the eluate had a pH of 7 and the product was eluted in one fraction with 1M HCOOH (50 ml). This fraction was evaporated to dryness, water (50 ml) was added to dissolve the residue, and the solution was evaporated to dryness again. The residue was dissolved in a little volume of water (ca. 2ml) and acetone was added (ca. 20 ml). The resulting precipitate was filtered, washed with acetone, and dried under reduced pressure. 1,4,7,10-Tetraazacyclotridecane tetraacetic acid was obtained as a white solid hydrated with ca. 1.5 mol water per mol ligand (175215 mg, 7085%). 1H NMR 400 MHz (D2O [HDO 4.80 ppm]) ** 2.00 (m, 2H), 3.223.31 (m, 16H), 3.52 (s, 8H); ESI-MS: 419.3 (MH+); Analysis calc. for C17H30N4O81.5H2O C 45.84, H 7.47, N 12.58, O 34.12; found: C 45.5, H 7.31, N 12.50, O 33.0.

### Synthesis of 12-(*p*-Nitrobenzyl)-1,4,7,10-tetraazacyclotridecane tetraacetic acid (TRITA-bz-NO2)

*12-(p-Nitrobenzyl)-1,4,7,10-tetraazacyclotridecane.* The macrocyclic amine for TRITA-bz-NO2 was synthesized as described in the literature [3] using the commercially available starting compound (*p*-Nitrobenzyl)malonic acid dimethyl ester (Aldrich).

*12-(p-Nitrobenzyl)-1,4,7,10-tetraazacyclotridecane tetraacetic acid.* *t*-Butyl bromoacetate (1.40 g, 7.2 mmol) and KI (140 mg, 0.84 mmol) were successively added to a stirred solution of 12-(*p*-Nitrobenzyl)-1,4,7,10-tetraazacyclotridecane (320 mg, 1.00 mmol) in dry DMF (10 ml) and diisopropylethylamine (DIEA, 1.24 g, 9.6 mmol) at room temperature and under Argon atmosphere. The mixture was stirred for 3 days and concentrated under reduced pressure at max. 40°C to give a viscous oil. Diethyl ether (15 ml) and water (8 ml) were added and the mixture was stirred until everything dissolved. The organic phase was separated, washed with water (8 ml) and concentrated under reduced pressure. The residue was refluxed with 6M HCl (30 ml) during 16 h, evaporated to dryness, dissolved in a minimum of water and loaded on a cation-exchange column (Bio-Rad AG 50W-X4, H+ form, 27 cm). The column was washed with water until the eluate had a pH of 7 and the product mixture was eluted in one fraction with 0.5M NH3 (100 ml). One third of the volume of this fraction was evaporated to dryness, dissolved in a minimum of water and loaded on an anion-exchange column (Bio-Rad AG 1-X4, converted into HCOO form, 27 cm). The column was washed with water until the eluate had a pH of 7 and the product was eluted with a 0.0251M gradient of HCOOH (total volume of eluent for gradient ca. 300 ml). The fraction of the ligand eluted at 0.30.4M HCOOH. The solvent was evaporated, water (50 ml) was added to dissolve the residue, and the solvent was evaporated again. The product was dried at high vacuum until all formic acid was removed. After storing at air 12-(*p*-Nitrobenzyl)-1,4,7,10-tetraazacyclotri-decane tetraacetic acid was obtained as a white solid hydrated with ca. 3 mol water per mol ligand (ca. 110 mg per anion-exchange chromatography, ca. 55%). 1H NMR 400 MHz (D2O [HDO 4.80 ppm]) ** 2.40 (m, 1H), 2.71 (d, 2H), 2.853.55 (m, 24H), 7.50 (d, 2H), 8.21 (d, 2H); ESI-MS: 554.5 (MH+); Analysis calc. for C24H35N5O103H2O C 47.44, H 6.80, N 11.53, O 34.23; found: C 47.7, H 6.89, N 11.6, O 32.0.

[1] G. Hervé, H. Bernard, N. Le Bris, J.-J. Yaouanc, H. Handel, L. Toupet, *Tetrahedron Lett.* 1998, **39**, 68616864.

[2] G. Hervé, H. Bernard, N. Le Bris, M. Le Baccon, J.-J. Yaouanc, H. Handel, *Tetrahedron Lett.* 1999, **40**, 25172520.

[3] G. Ruser, W. Ritter, H. R. Maecke, *Bioconjugate Chem.* 1990, **1**, 345349.

**Table S1** Variable temperature reduced transverse and longitudinal 17O relaxation rates and chemical shifts of [GdIII(TRITA)(H2O)]- solution at 9.4 T. cGd = 0.0304 mol/kg; Pm = 5.4810-4.

| **T/K** | **1000/T** | **T1/s(ref)** | **T1/s** | **ln(1/T1r)** | **T2/s(ref)** | **T2/s** | **ln(1/T2r)** | **ref /Hz** | **frec /Hz** | **r /Hz** |
| --- | --- | --- | --- | --- | --- | --- | --- | --- | --- | --- |
| **312** | 3.20 | 9.78E-03 | 9.20E-03 | 9.37 | 9.81E-03 | 4.99E-03 | 12.10 | -1 | -80 | -9.06E+05 |
| **329** | 3.04 | 1.34E-02 | 1.29E-02 | 8.71 | 1.34E-02 | 7.02E-03 | 11.73 | -3703 | -3774 | -8.14E+05 |
| **343** | 2.92 | 1.68E-02 | 1.60E-02 | 8.59 | 1.67E-02 | 8.94E-03 | 11.46 | -3733 | -3800 | -7.69E+05 |
| **366** | 2.74 | 2.38E-02 | 2.22E-02 | 7.65 | 2.28E-02 | 1.34E-02 | 10.94 | -3789 | -3850 | -7.00E+05 |
| **297** | 3.37 | 6.74E-03 | 6.42E-03 | 9.53 | 6.81E-03 | 3.66E-03 | 12.35 | -3621 | -3707 | -9.86E+05 |
| **272** | 3.67 | 3.19E-03 | 3.01E-03 | 10.43 | 3.11E-03 | 1.89E-03 | 12.85 | -3565.5 | -3659 | -1.07E+06 |
| **285** | 3.51 | 4.76E-03 | 4.57E-03 | 9.68 | 4.89E-03 | 2.79E-03 | 12.54 | -3592.8 | -3682 | -1.02E+06 |

**Table S2** Variable temperature reduced transverse and longitudinal 17O relaxation rates and chemical shifts of [GdIII(TRITA-bz-NO2)(H2O)]- solution at 9.4 T. cGd = 0.0219 mol/kg; Pm = 3.9510-4.

| **T/K** | **1000/T** | **T1/s(ref)** | **T1/s** | **ln(1/T1r)** | **T2/s(ref)** | **T2/s** | **ln(1/T2r)** | **ref /Hz** | **frec /Hz** | **r /Hz** |
| --- | --- | --- | --- | --- | --- | --- | --- | --- | --- | --- |
| **302** | 3.31 | 8.05E-03 | 7.26E-03 | 10.44 | 8.04E-03 | 4.26E-03 | 12.54 | 531.8 | 477 | -8.72E+05 |
| **330** | 3.03 | 1.46E-02 | 1.35E-02 | 9.58 | 1.47E-02 | 9.14E-03 | 11.56 | 457.7 | 413.3 | -7.07E+05 |
| **349** | 2.86 | 1.99E-02 | 1.86E-02 | 9.14 | 2.03E-02 | 1.34E-02 | 11.06 | 409.7 | 371.2 | -6.13E+05 |
| **317** | 3.15 | 1.11E-02 | 1.02E-02 | 9.97 | 1.13E-02 | 6.46E-03 | 12.03 | 495.35 | 443.3 | -8.28E+05 |
| **273** | 3.66 | 3.11E-03 | 2.79E-03 | 11.42 | 3.17E-03 | 1.62E-03 | 13.55 | 604.5 | 545.8 | -9.34E+05 |
| **282** | 3.55 | 4.38E-03 | 3.94E-03 | 11.08 | 4.43E-03 | 2.16E-03 | 13.31 | 579 | 521 | -9.23E+05 |
| **292** | 3.42 | 6.18E-03 | 5.63E-03 | 10.60 | 6.28E-03 | 3.06E-03 | 12.96 | 551 | 493.5 | -9.15E+05 |

**Fig. S1** Temperature dependence of the reduced transverse (), longitudinal () 17O relaxation rates and chemical shifts () for [Gd(TRITA-bz-NO2)(H2O)]- at B=9.4 T.

Fig. S2 Temperature dependence of the reduced transverse (), longitudinal () 17O relaxation rates and chemical shifts () for [Gd(TRITA)(H2O)]- at B=9.4 T.


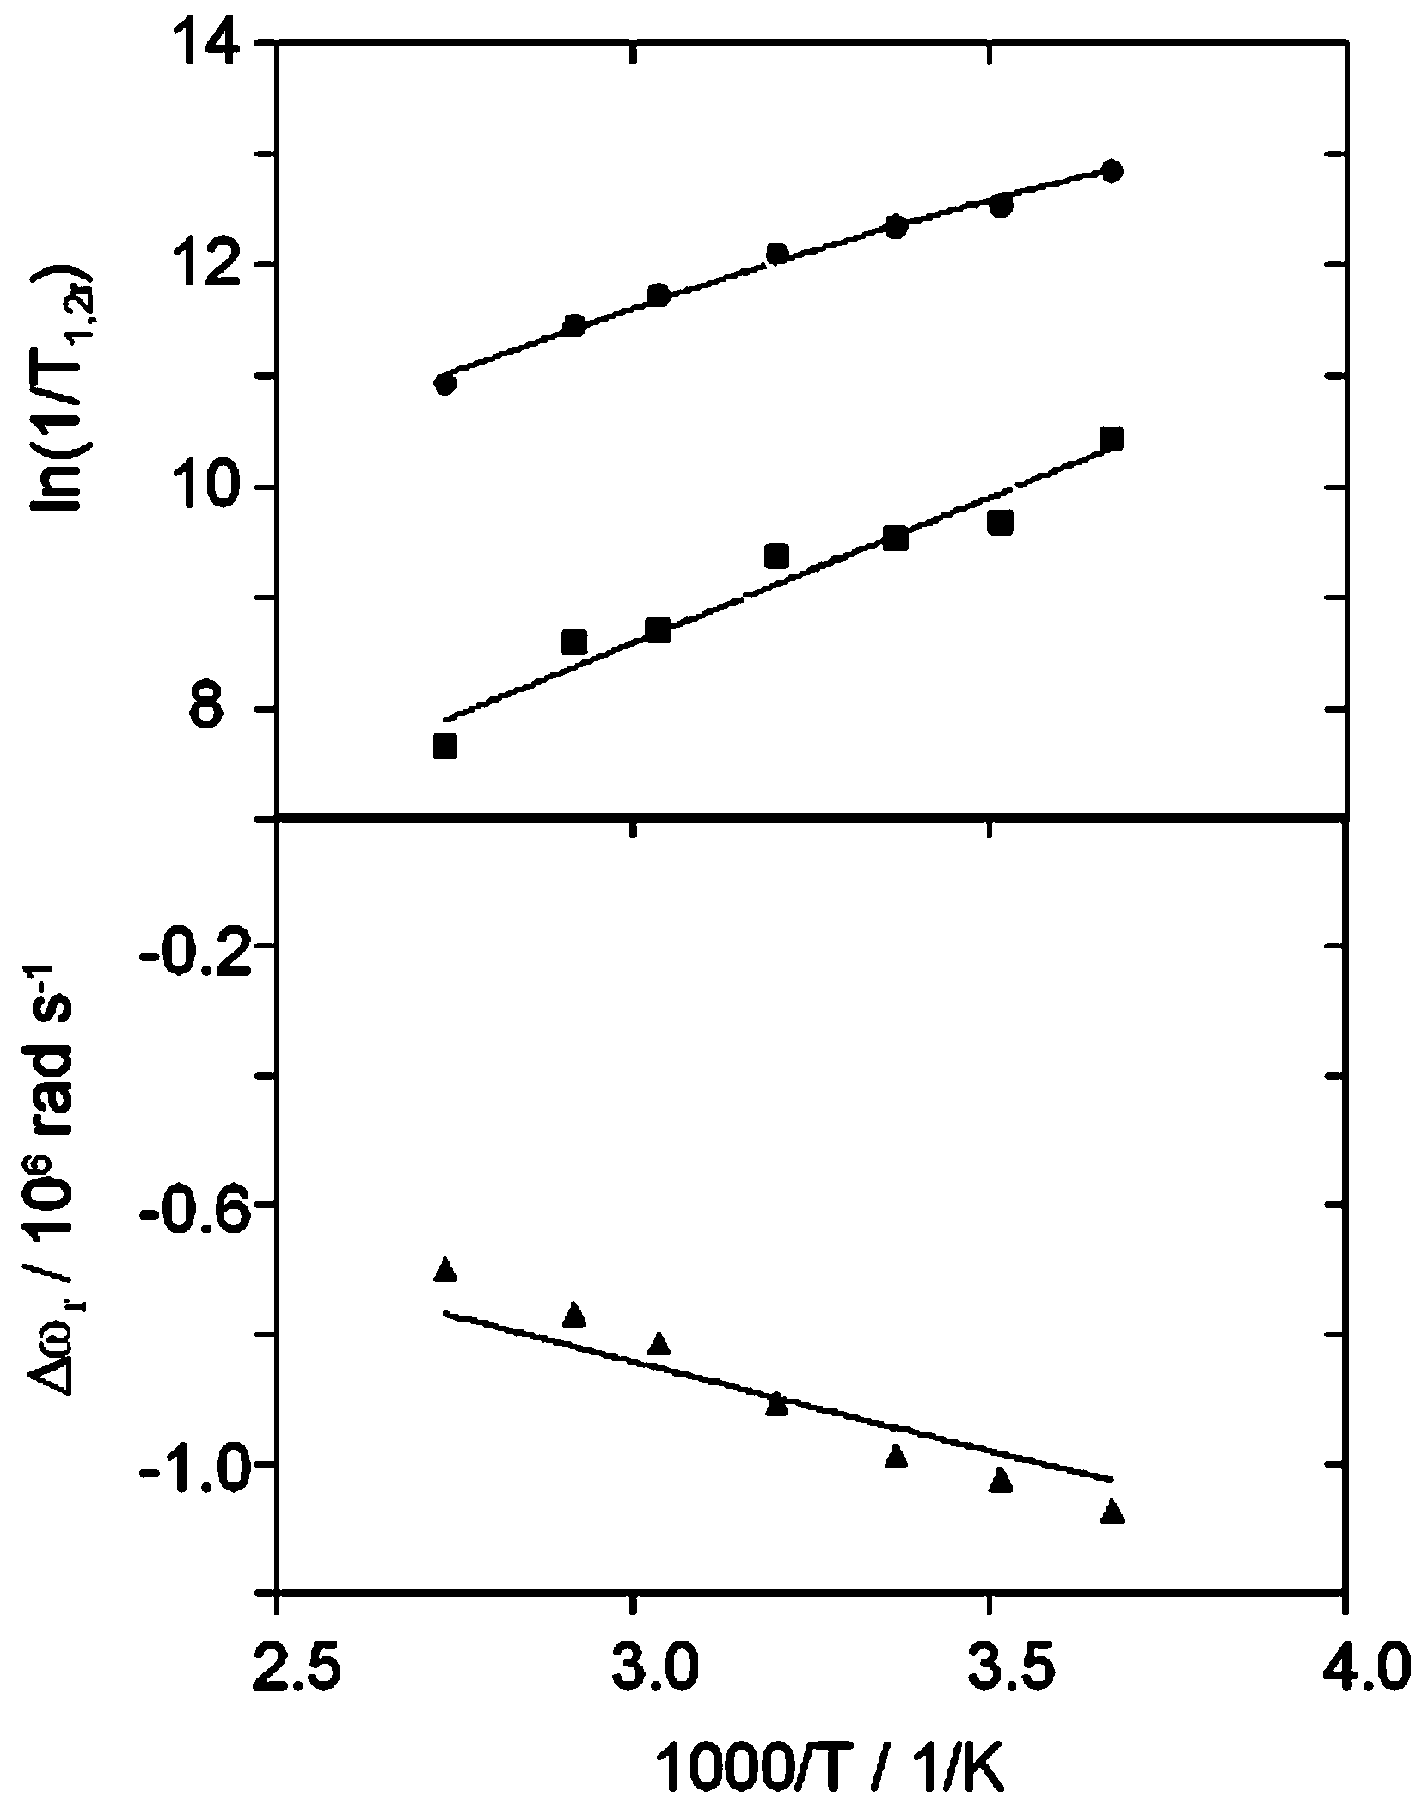

Supplement: b207713b.doc [file b207713b.doc]
